# Supplementary material for: Oxidation-induced constituent separation of magnetic exchange biased Fe/CoO nanocrystals
Source: Royal Society of Chemistry journal article supplement (doi:10.1039/b912976f), 2009-01-01
Supplement: b912976f.pdf [file b912976f.pdf]

## Supporting Information

### Oxidation-induced constitute separation of magnetic exchange biased Fe/CoO nanocrystals

#### Experimental Section

**Preparation:** All chemicals and solvents are used as obtained. Typically, cobalt (II) and iron (II)-oleate precursors mixture was prepared at 70 °C from the reactions of 4-mmol sodium oleate with 1.75-mmol CoCl<sub>2</sub>•6H<sub>2</sub>O and 0.25-mmol FeCl<sub>2</sub>•6H<sub>2</sub>O in a mixture of hexane, ethanol, and water (hexane/ethanol/water=10-mL/6-mL/4-mL) for 6 hours. The obtained upper hexane layer was washed with DI water for four times followed by solvent removal via evaporation under vacuum. Then 25-mL octyl ether was added in the flask, and the obtained mixture was heated at 150 °C under vacuum for 2 hours, followed by rapid heating (~ 14 °C /min) to boiling (287 °C) within 10 min. A violent reaction lasted for 30 min to form a black particle solution which was further annealed for 3 hours. The product was purified by a commercial magnet using hexane/ethanol for 3-cycle. The diffusion-limited growth is the plausible mechanism for the formation of star-shaped nanocrystals.

**Characterization:** Low-magnification and high-resolution TEM images were obtained with a Zeiss 912 Omega transmission electron microscope (TEM) operating at accelerate voltage of 120 kV and a FEI Tecnai F20 transmission electron microscope (HRTEM) operating at accelerate voltage of 200 kV, respectively. Electron energy loss (EEL) spectra and element mappings images were recorded on a Zeiss 912 microscope operated with an in-column Omega energy filler. Energy loss was calibrated before measurement using a standard NiO<sub>x</sub> sample to the peak of Ni-L<sub>3</sub> edge at 854 eV. All spectra were recorded using a parallel-mode with a spectral magnification of 163X. The energy resolution was about 1.8 eV with an energy dispersion of 0.12 eV pixel<sup>-1</sup>. Magnetic studies were carried out using a Quantum design MPMS-5S SQUID magnetometer with temperatures from 1.8 to 390 K. X-ray diffraction (XRD) was run on a MPD multi-purpose diffractometer with Co K<sub>α</sub> (λ = 0.178897 nm) radiation and X'Celerator detector (Philips). Iron and cobalt contents were measured by using a Perkin-Elmer Optima 3000 Spectrometer.

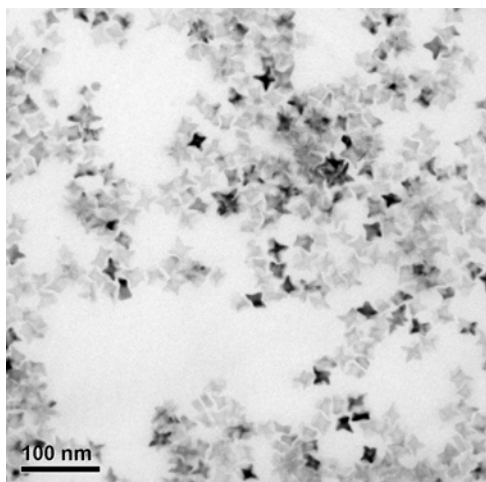

**Figure S1.** Additional TEM image of Fe/CoO nanocrystals.

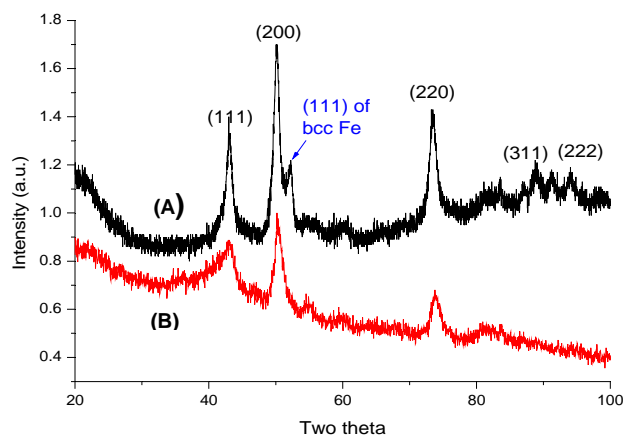

**Figure S2.** XRD patterns of (A) as-synthesized Fe/CoO nanocrystals and (B) Fe/CoO nanocrystals after oxidative dissociation under ambient conditions over a time of period of 2-month. However, the corresponding XRD patterns didn't give out the peaks of cubic magnetite, which may result from their amorphous nature (low crystallinity).

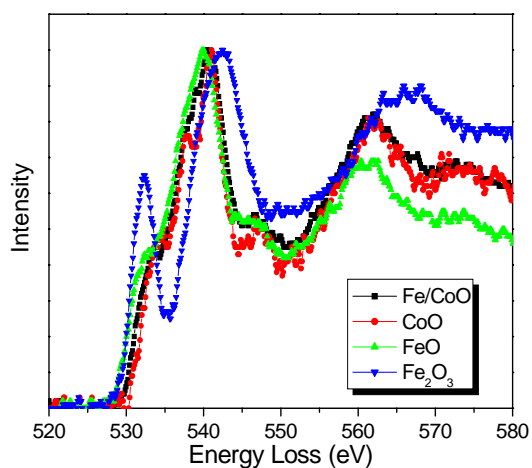

**Figure S3.** EELS oxygen valence analysis spectrum of the Fe/CoO nanocrystals.

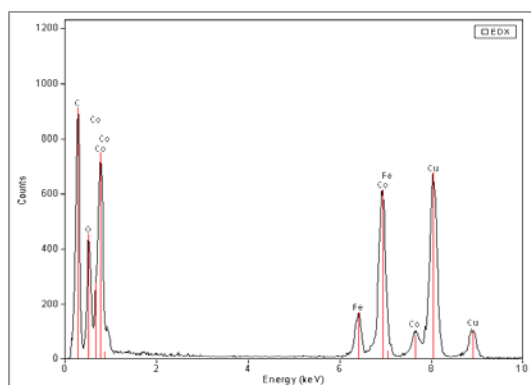

**Figure S4.** EDS analysis results for the as-synthesized Fe/CoO nanocrystals.

#### Quantification Results

| Element | Weight % | Atomic % | Uncertainty % | Correction | k-Factor |
|---------|----------|----------|---------------|------------|----------|
| C(K)    | 52.719   | 79.260   | 0.415         | 0.173      | 6.279    |
| O(K)    | 8.079    | 9.119    | 0.097         | 0.514      | 1.980    |
| Fe(K)   | 3.291    | 1.064    | 0.054         | 0.994      | 1.480    |
| Co(K)   | 15.844   | 4.854    | 0.109         | 0.995      | 1.576    |
| Cu(K)   | 20.065   | 5.701    | 0.127         | 0.997      | 1.757    |

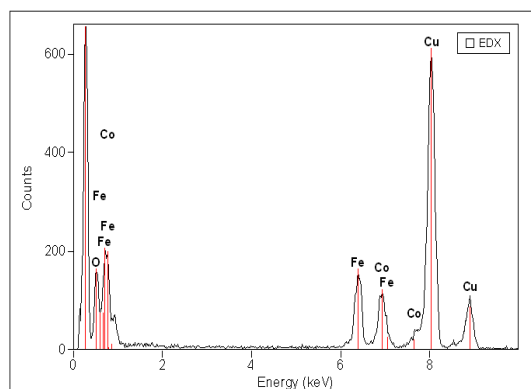

**Figure S5.** EDS analysis results for the etched-out small nanocrystals of 5 ~ 10 nm in sizes.

### Quantification Results

| Element | Weight % | Atomic % | Uncertainty % | Correction | k-Factor |
|---------|----------|----------|---------------|------------|----------|
| C(K)    | 59.813   | 85.916   | 0.575         | 0.173      | 6.279    |
| O(K)    | 3.592    | 3.873    | 0.091         | 0.514      | 1.980    |
| Fe(K)   | 4.926    | 1.521    | 0.080         | 0.994      | 1.480    |
| Co(K)   | 4.227    | 1.237    | 0.069         | 0.995      | 1.576    |
| Cu(K)   | 27.439   | 7.449    | 0.186         | 0.997      | 1.757    |

In comparison, the composition of the Fe/CoO nanocrystals was analyzed by ICP-AES. The molar ratio of iron and cobalt in Fe/CoO nanocrystals before and after oxidation-induced phase separation are 0.19:1 and 1.23:1, respectively.
